# Supplementary material for: Systematic Identification and Functional Analysis of the Hypericum perforatum L. bZIP Gene Family Indicating That Overexpressed HpbZIP69 Enhances Drought Resistance
Source: MDPI journal article supplement (doi:10.3390/ijms241814238), 2023-09-18
Supplement: s1 [file s1]

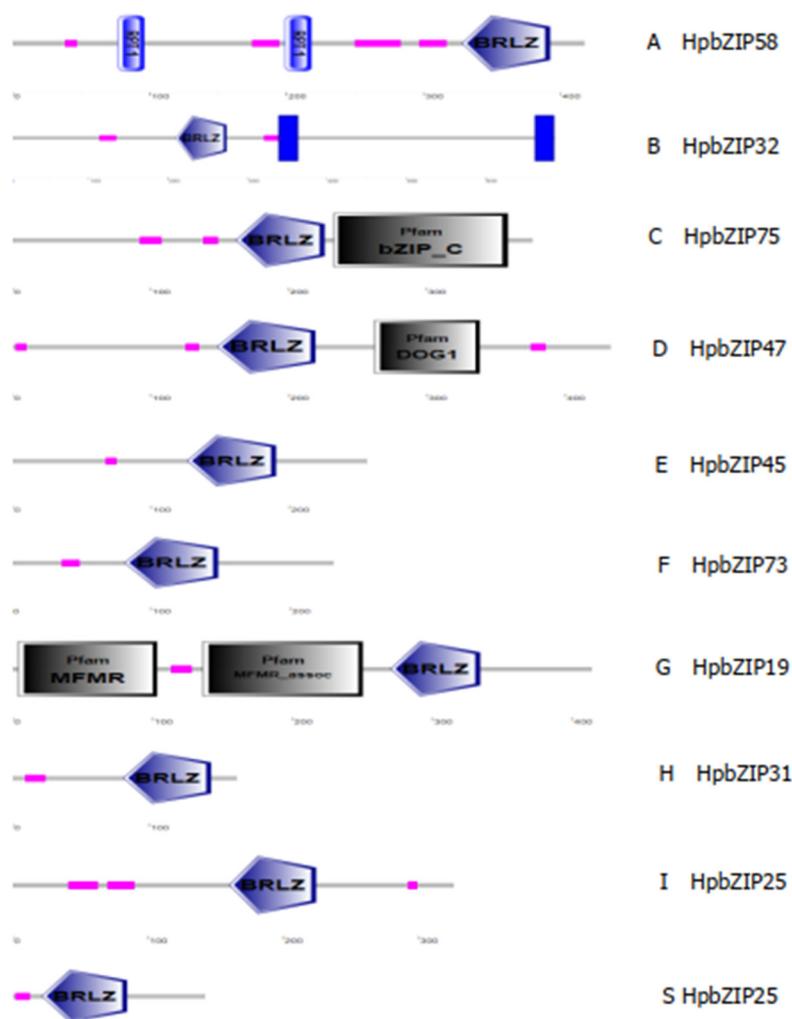

**Figure S1:** Structure of representative HpbZIP proteins from each subgroup.

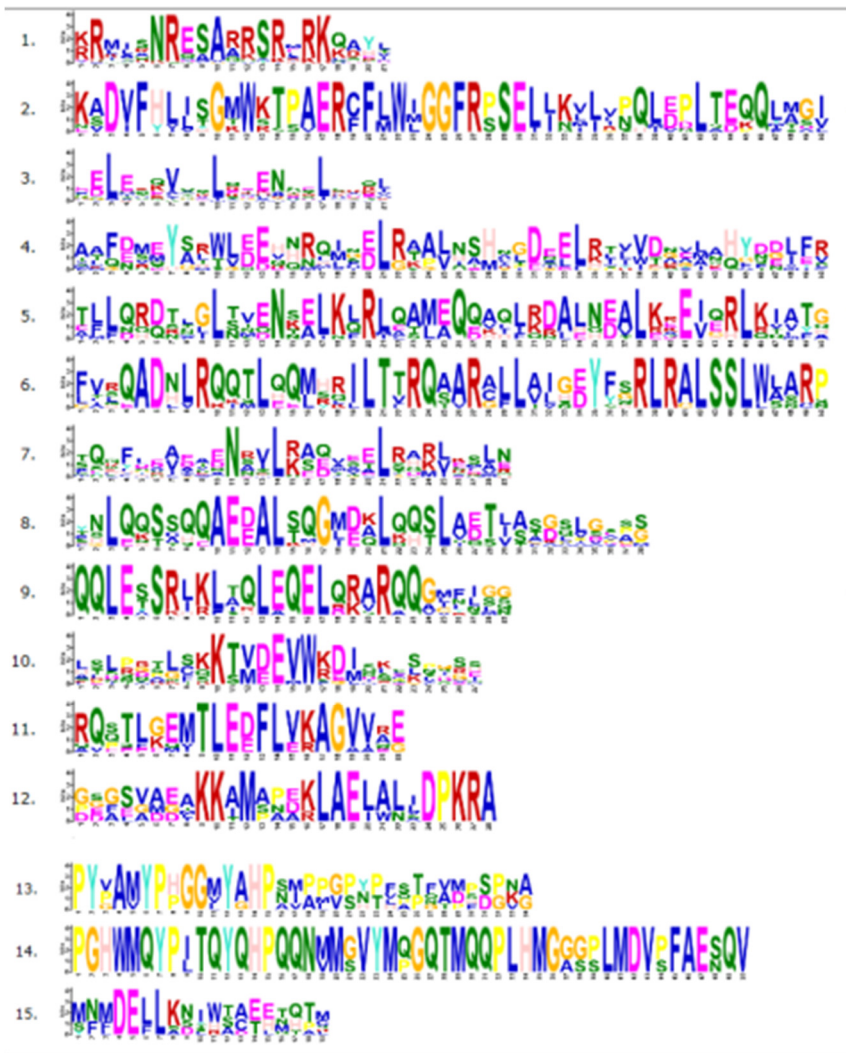

**Figure S2:** Seqlogo of conserved motifs in HpbZIP proteins.

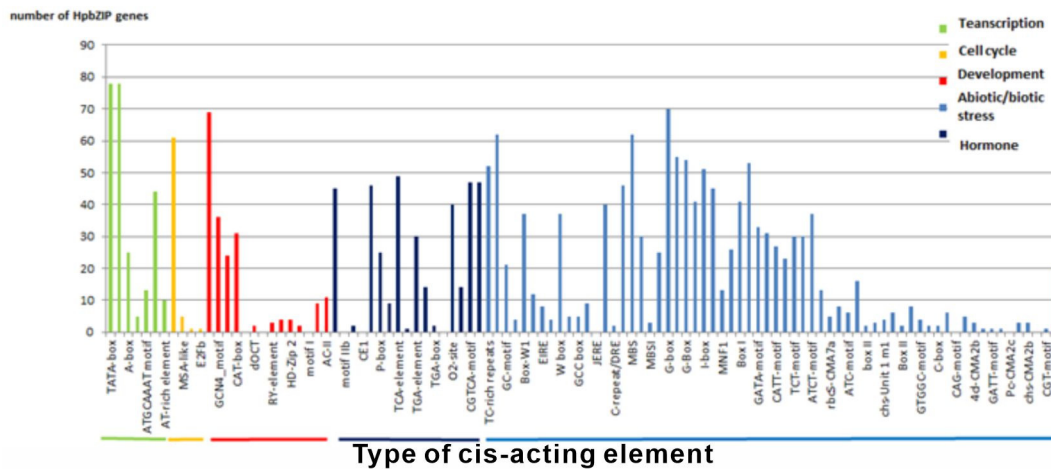

**Figure S3:** Cis-Acting elements analysis of *HpbZIP* gene promoters. The cis-acting elements were identified by the online PlantCARE program using 1.5 kb upstream of transcription initiation site of *HpbZIP* genes. The graph was generated based on the presence of cis-acting elements in response to specific processes /elicitors/conditions (x-axis) in *HpbZIP* family members (y-axis).

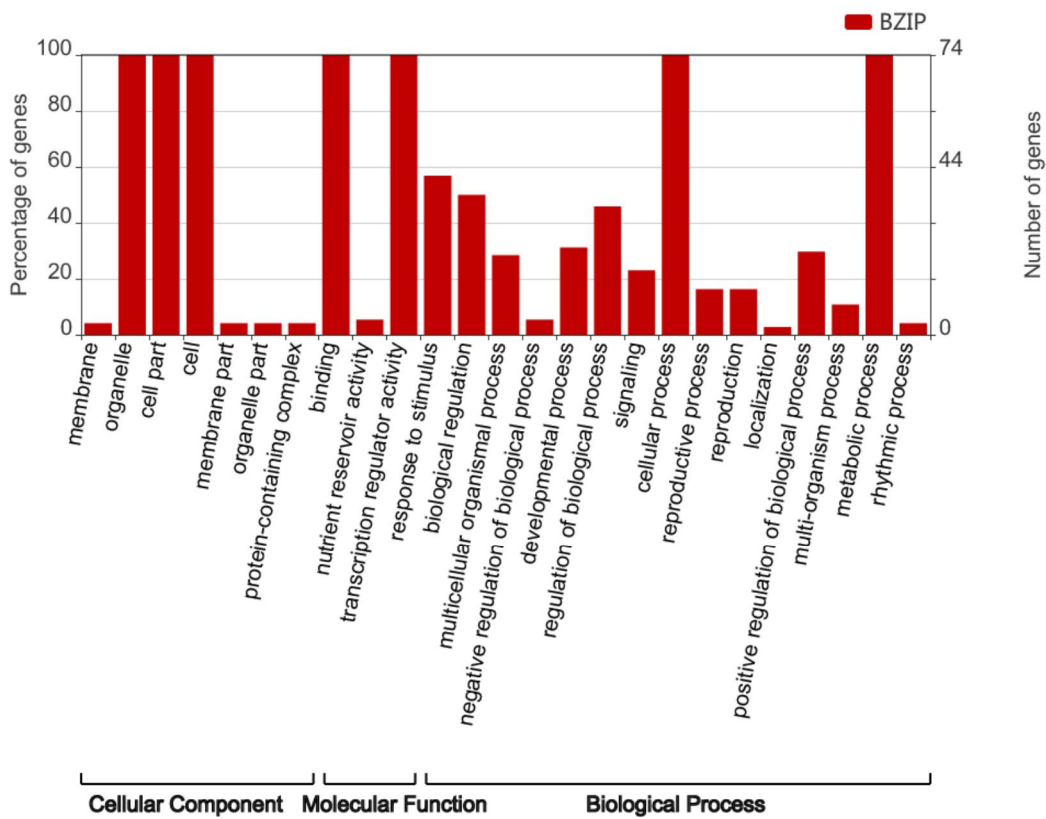

**Figure S4:** Gene Ontology annotation results for HpbZIP proteins. The y-axis on the left side indicates the percentage of a specific category of genes in the main category, and the right side indicates the number of genes in a category.

| 14 Nearest Neighbors |      |          |                          |                                                   |                                                  |
|----------------------|------|----------|--------------------------|---------------------------------------------------|--------------------------------------------------|
| id                   | site | distance | identity                 | comments                                          |                                                  |
| HSF8_LYCPE           | nucd | 213.887  | <a href="#">12.7135%</a> | <a href="#">[Uniprot]</a>                         | SWISS-PROT45:Nuclear.                            |
| AG_BRANA             | nucd | 227.742  | <a href="#">12.5668%</a> | <a href="#">[Uniprot]</a>                         | SWISS-PROT45:Nuclear.                            |
| AGL1_ARATH           | nucd | 239.361  | <a href="#">12.5668%</a> | <a href="#">[Uniprot]</a>                         | SWISS-PROT45:Nuclear.                            |
| GBF1_ARATH           | nucd | 243.374  | <a href="#">13.1016%</a> | <a href="#">[Uniprot]</a>                         | SWISS-PROT45:Nuclear.                            |
| GBF2_ARATH           | nucd | 246.724  | <a href="#">11.7021%</a> | <a href="#">[Arabi]</a> <a href="#">[Uniprot]</a> | SWISS-PROT45:Nuclear. Evidence:IDA Pubmed9193069 |
| GBF3_ARATH           | nucd | 252.626  | <a href="#">10.1828%</a> | <a href="#">[Uniprot]</a>                         | SWISS-PROT45:Nuclear.                            |
| CPR3_PETCR           | nucd | 254.56   | <a href="#">13.9037%</a> | <a href="#">[Uniprot]</a>                         | SWISS-PROT45:Nuclear.                            |
| At2g34900.1          | nucd | 255.847  | <a href="#">10.5398%</a> | <a href="#">[Arabi]</a>                           |                                                  |
| HFR1_ARATH           | nucd | 255.915  | <a href="#">10.1604%</a> | <a href="#">[Uniprot]</a>                         | SWISS-PROT45:Nuclear.                            |
| At5g54110.1          | plas | 257.636  | <a href="#">11.2299%</a> | <a href="#">[Arabi]</a>                           |                                                  |
| HAT5_ARATH           | nucd | 260.988  | <a href="#">11.2299%</a> | <a href="#">[Uniprot]</a>                         | SWISS-PROT45:Nuclear.                            |
| HKN1_MAIZE           | nucd | 262.871  | <a href="#">11.2299%</a> | <a href="#">[Uniprot]</a>                         | SWISS-PROT45:Nuclear.                            |
| At1g33760.1          | nucd | 262.93   | <a href="#">11.4973%</a> | <a href="#">[Arabi]</a>                           |                                                  |
| HSF8_LYCES           | nucd | 264.341  | <a href="#">12.9032%</a> | <a href="#">[Uniprot]</a>                         | SWISS-PROT45:Nuclear.                            |

HpbZIP69

**Figure S5:** Predicted subcellular localization of HpbZIP69 using WoLFPSOR (<https://wolfpsort.hgc.jp/>).
