# Supplementary material for: Systematic Identification and Functional Analysis of the Hypericum perforatum L. bZIP Gene Family Indicating That Overexpressed HpbZIP69 Enhances Drought Resistance
Source: Int J Mol Sci. 2023 Sep 18;24(18):14238. doi: 10.3390/ijms241814238 (PMC10531856; doi:10.3390/ijms241814238)
Supplement: Supplementary file 1 [file ijms-24-14238-s001.zip]

Archive with 5 entries (5 files):
- ijms-2536327-supplementary figures.pdf
- Supplemental Table S1.xlsx
- Supplemental Table S2.xlsx
- Supplemental Table S3.xlsx
- Supplemental Table S4.xlsx
